# Supplementary material for: Carbon-layered double hydroxide nanocomposite for efficient removal of inorganic and organic based water contaminants – unravelling the adsorption mechanism
Source: Royal Society of Chemistry journal article supplement (doi:10.1039/d1ma00064k), 2021-01-01
Supplement: d1ma00064k1.pdf [file d1ma00064k1.pdf]

## **Carbon-layered double hydroxide nanocomposite for efficient removal of inorganic and organic based water contaminants – unravelling the adsorption mechanism**

Sukanya Kundu<sup>1,2</sup> and Milan Kanti Naskar<sup>1,2\*</sup>

<sup>1</sup>CSIR-Central Glass and Ceramic Research Institute, Kolkata 700 032

<sup>2</sup>Academy of Scientific and Innovative Research (AcSIR), Ghaziabad-201002

\*Corresponding author E-mail: milan@cgcricri.res.in

### Synthesis of Porous Carbon Nanospheres

An alkaline solution of phenol (0.6 g) and formaldehyde (2.1 mL) in 15 mL NaOH solution (0.1M) was prepared at 70 °C under stirring for 30 min. A tri-block copolymers, F108 (15 mL, 0.07 mmol) was introduced into the above solution followed by heating at 65 °C for 2 h under stirring. It was diluted by adding 50 mL water and stirring was continued for 16 h. 20 mL of the above solution was further diluted with 60 mL of water followed by autoclave heating at 130 °C for 24 h. The synthesized material was collected by centrifugation, washing and drying. Carbonization of the material was done by heating at 700 °C for 3h (heating rate 4°C/min) under controlled N<sub>2</sub> atmosphere (flow rate of 40 mL/min). The synthesized porous carbon was designated as CF108.

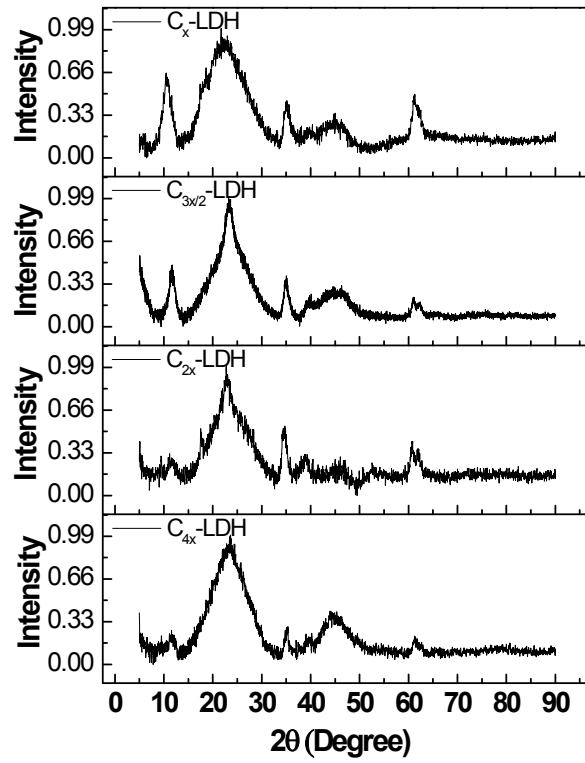

Fig. S1: Plot of normalized intensity vs  $2\theta$  (degree)

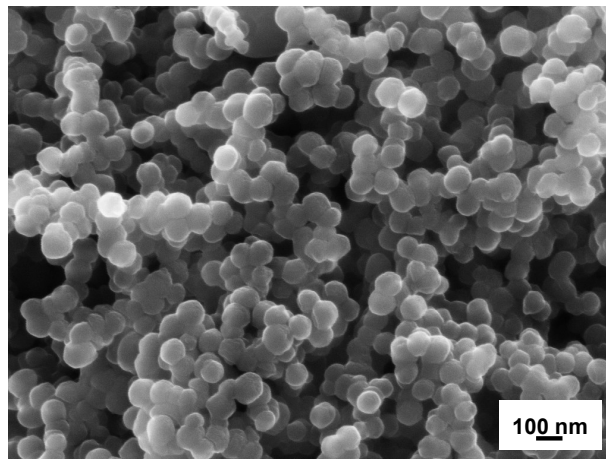

Fig. S2: FESEM image of porous carbon material

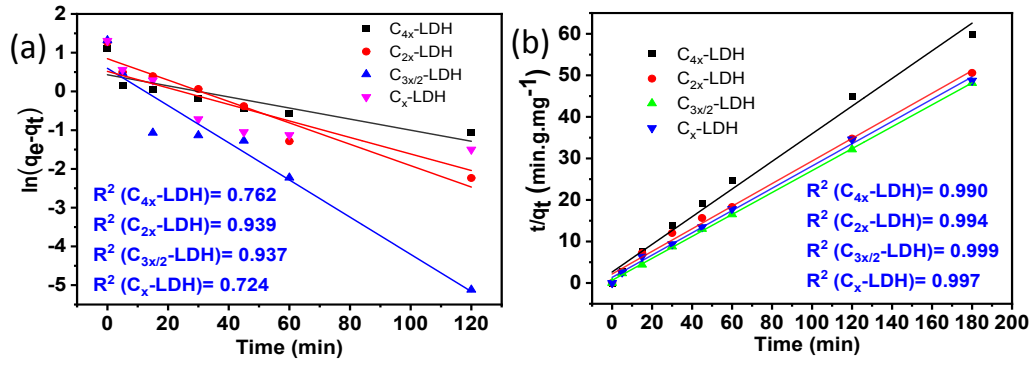

Fig. S3 (a) Pseudo-1<sup>st</sup> order and (b) Pseudo-2<sup>nd</sup> order kinetic models of C-LDH for the adsorption of As(V)

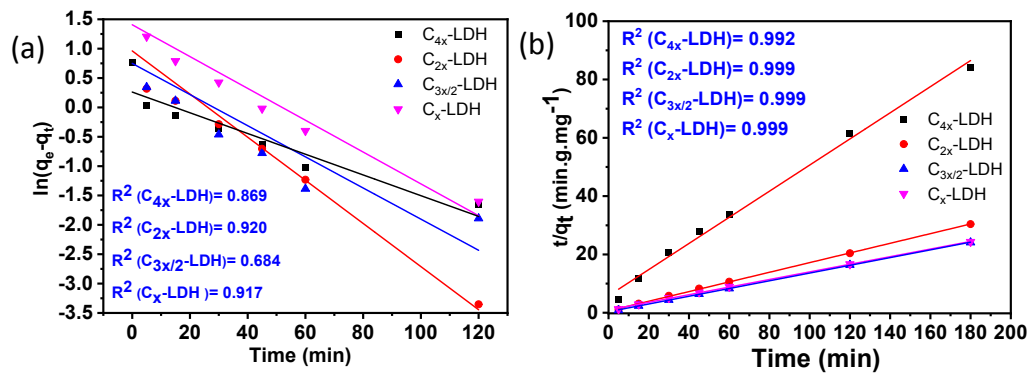

Fig. S4 (a) Pseudo-1<sup>st</sup> order and (b) Pseudo-2<sup>nd</sup> order kinetic models of C-LDH for the adsorption of F<sup>-</sup>.

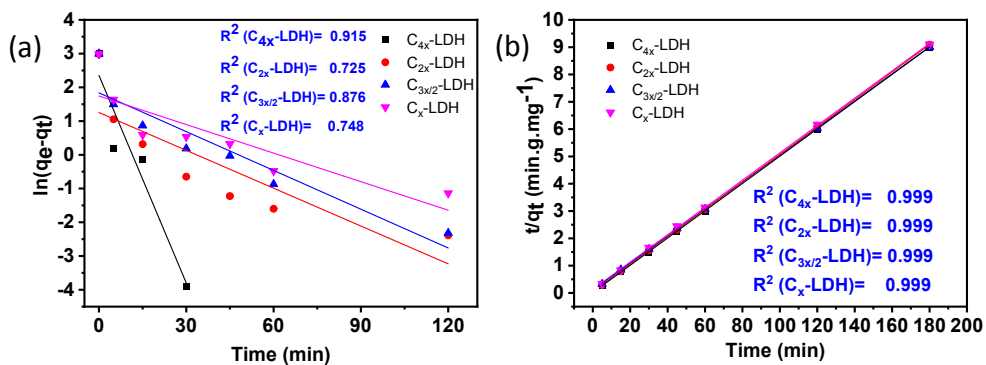

Fig. S5 (a) Pseudo-1<sup>st</sup> order and (b) Pseudo-2<sup>nd</sup> order kinetic models of C-LDH for the adsorption of Fe(II)/Fe(III).

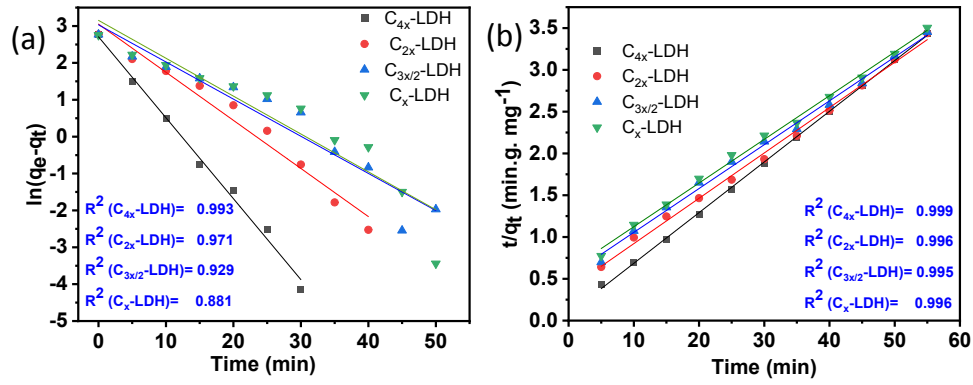

Fig. S6 (a) Pseudo-1<sup>st</sup> order and (b) Pseudo-2<sup>nd</sup> order kinetic models of C-LDH for the adsorption of MB.

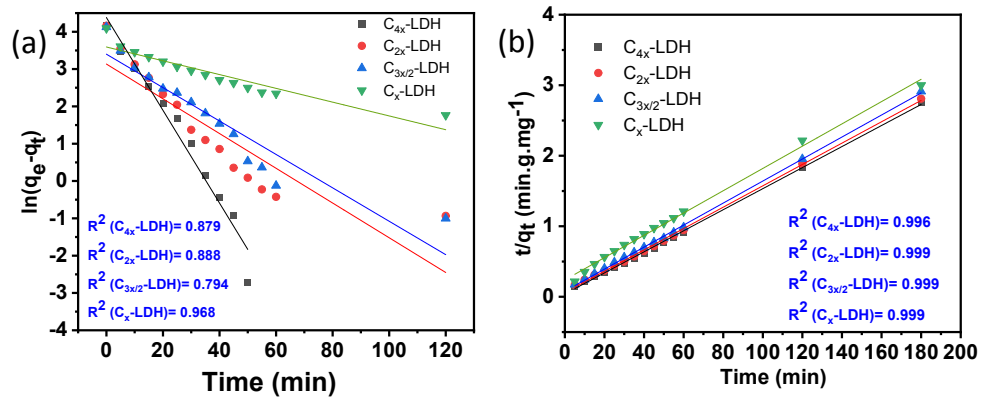

Fig. S7 (a) Pseudo-1<sup>st</sup> order and (b) Pseudo-2<sup>nd</sup> order kinetic models of C-LDH for the adsorption of MO.

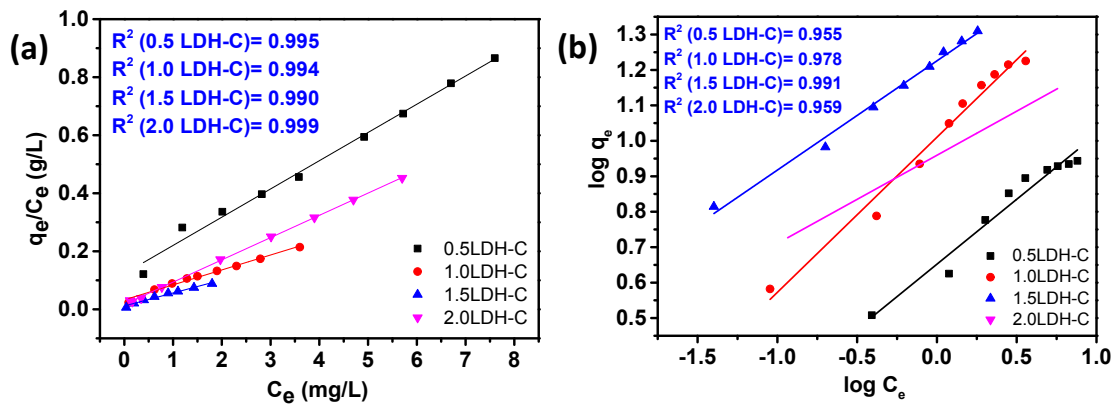

Fig. S8 Plot of (a) Langmuir and (b) Freundlich isotherm model for the adsorption of As(V)

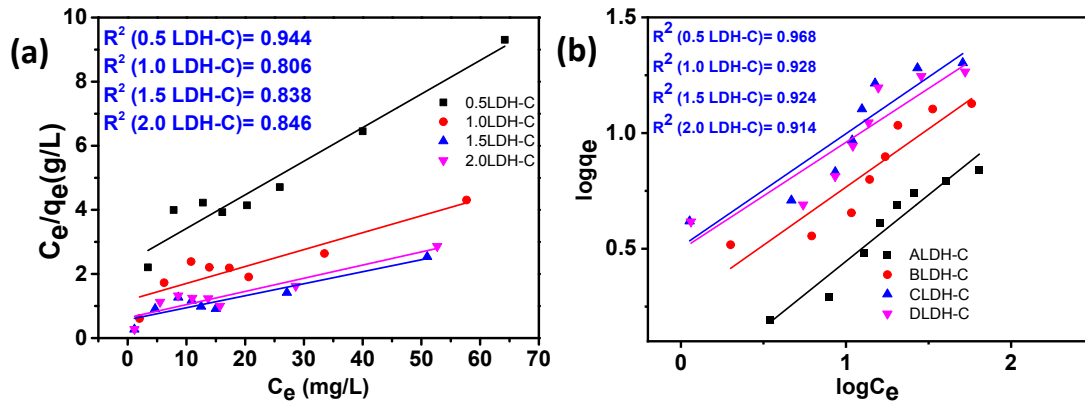

Fig. S9 Plot of (a) Langmuir and (b) Freundlich isotherm model for the adsorption of  $F^-$ .

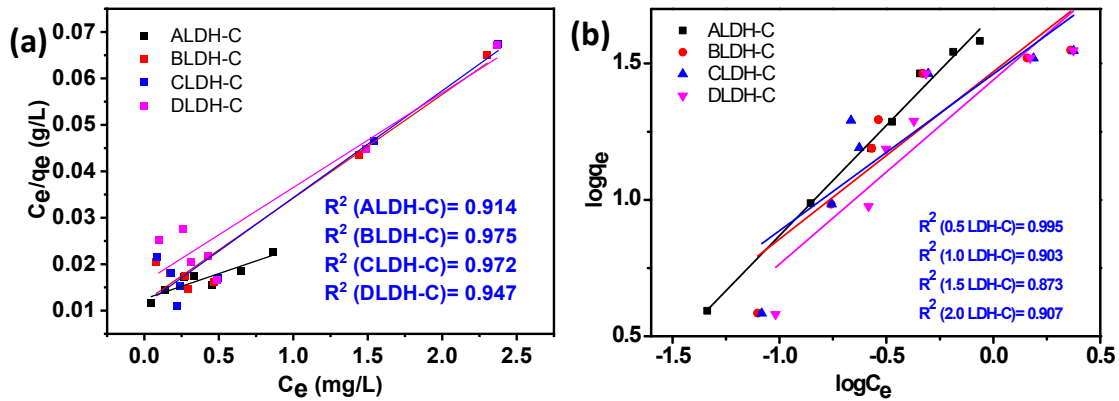

Fig. S10 Plot of (a) Langmuir and (b) Freundlich isotherm model for the adsorption of  $Fe(II)/Fe(III)$ .

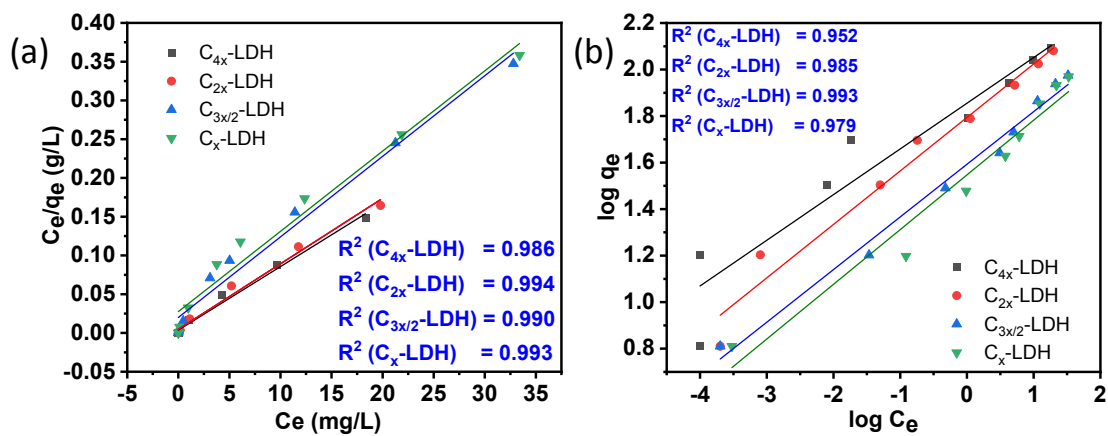

Fig. S11 Plot of (a) Langmuir and (b) Freundlich isotherm model for the adsorption of MB.

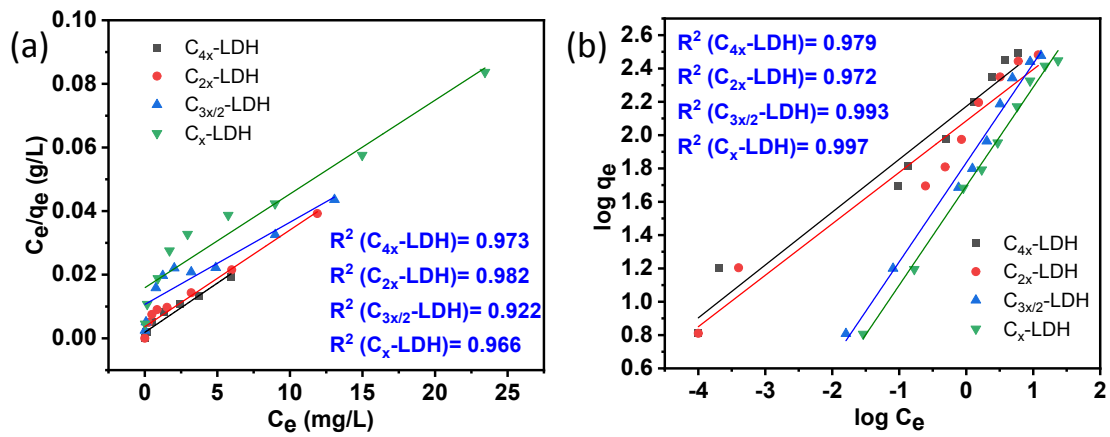

Fig. S12 Plot of (a) Langmuir and (b) Freundlich isotherm model for the adsorption of MO.

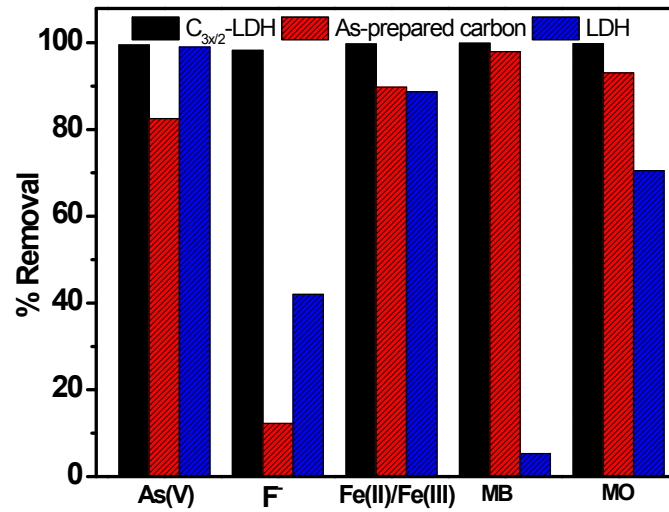

Fig. S13 Plot of comparative study on removal of pollutants by  $C_{3x/2}$ -LDH, As-prepared carbon and LDH.

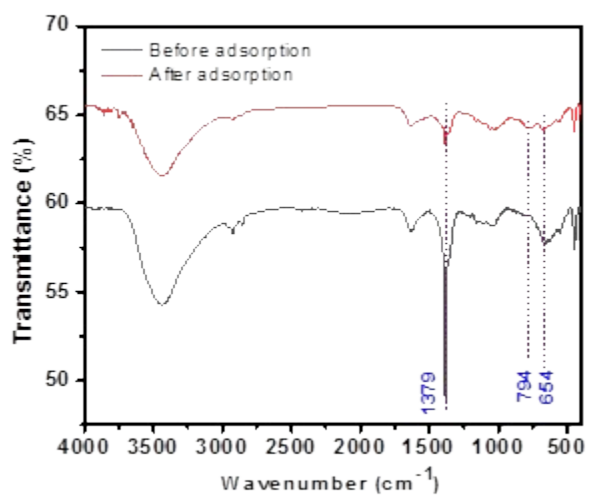

Fig. S14 FTIR plot of  $C_{3x/2}$ -LDH before and after adsorption of water pollutants

Table S1: Quantitative estimation of C1s, O1s, Al2p, Mg2p and Ca2p for C-LDH from XPS study

| Sample ID       | C1s   | O1s   | Al2p | Mg2p | Ca2p |
|-----------------|-------|-------|------|------|------|
| $C_{4x}$ -LDH   | 75.82 | 18.12 | 2.26 | 2.75 | 1.05 |
| $C_{2x}$ -LDH   | 65.24 | 26.29 | 3.88 | 3.16 | 1.43 |
| $C_{3x/2}$ -LDH | 57.45 | 30.33 | 5.25 | 4.92 | 2.05 |
| $C_x$ -LDH      | 52.61 | 33.10 | 5.25 | 6.72 | 2.32 |

Table S2: Quantitative estimation (atomic%) of C (from carbon analyzer) and Al, Mg and Ca (from ICP-AES) of C-LDH

| Sample ID              | C     | Al   | Mg   | Ca   | Al:Mg:Ca    |
|------------------------|-------|------|------|------|-------------|
| C <sub>4x</sub> -LDH   | 57.50 | 2.45 | 3.33 | 1.95 | 1:1.36:0.79 |
| C <sub>2x</sub> -LDH   | 40.50 | 4.99 | 6.90 | 3.64 | 1:1.38:0.73 |
| C <sub>3x/2</sub> -LDH | 38.10 | 5.52 | 7.23 | 3.92 | 1:1.31:0.71 |
| C <sub>x</sub> -LDH    | 30.30 | 6.07 | 8.28 | 3.99 | 1:1.36:0.66 |

Table S3: Percentage removal of As(V), F<sup>-</sup>, Fe(II)/Fe(III), MB and MO at different times using different C-LDH composites.

| Sample ID              | % Removal of different water contaminants at 5 min/60 min/180 min |                |                |               |                |
|------------------------|-------------------------------------------------------------------|----------------|----------------|---------------|----------------|
|                        | As(V)                                                             | F <sup>-</sup> | Fe(II)/Fe(III) | MB            | MO             |
| C <sub>4x</sub> -LDH   | 49.2/65.2/80.5                                                    | 10.4/16.8/20.2 | 93.8/99.9/99.9 | 71.7/100/100  | 50.7/100/100   |
| C <sub>2x</sub> -LDH   | 51.1/87.7/95.1                                                    | 45.4/56.3/59.2 | 84.6/97.9/98.9 | 48.8/100/100  | 44.9/96.9/97.9 |
| C <sub>3x/2</sub> -LDH | 57.1/97.0/99.9                                                    | 60.6/72.2/74.7 | 77.5/97.8/99.9 | 44.7/99.8/100 | 44.1/93.1/94.5 |
| C <sub>x</sub> -LDH    | 52.0/90.1/98.7                                                    | 40.6/67.3/74.0 | 73.2/95.8/98.9 | 40.4/98.5/100 | 35.3/75.8/91.7 |



Table S4: Kinetics data for the adsorption of As(V), F<sup>-</sup>, Fe(II)/Fe(III), MB and MO on C-LDH composites

| Contaminant    | Sample ID              | Pseudo-1 <sup>st</sup> order equation: |        |       | Pseudo-2 <sup>nd</sup> order equation:  |        |       |
|----------------|------------------------|----------------------------------------|--------|-------|-----------------------------------------|--------|-------|
|                |                        | $\ln (q_e - q_t) = -k_1 t + \ln q_e$   |        |       | $t/q_t = 1/k_2 q_e^2 + (1/q_e)t$        |        |       |
|                |                        | $k_1$                                  | $q_e$  | $R^2$ | $k_2$                                   | $q_e$  | $R^2$ |
|                |                        | (min <sup>-1</sup> )                   | (mg/g) |       | (g.mg <sup>-1</sup> min <sup>-1</sup> ) | (mg/g) |       |
| As(V)          | C <sub>4x</sub> -LDH   | 0.014                                  | 1.537  | 0.762 | 0.042                                   | 3.004  | 0.990 |
|                | C <sub>2x</sub> -LDH   | 0.027                                  | 2.327  | 0.939 | 0.033                                   | 3.677  | 0.994 |
|                | C <sub>3x/2</sub> -LDH | 0.048                                  | 1.816  | 0.937 | 0.106                                   | 3.787  | 0.999 |
|                | C <sub>x</sub> -LDH    | 0.021                                  | 1.678  | 0.724 | 0.053                                   | 3.729  | 0.997 |
| F <sup>-</sup> | C <sub>4x</sub> -LDH   | 0.017                                  | 1.298  | 0.869 | 0.034                                   | 2.232  | 0.992 |
|                | C <sub>2x</sub> -LDH   | 0.036                                  | 2.616  | 0.613 | 0.043                                   | 6.038  | 0.999 |
|                | C <sub>3x/2</sub> -LDH | 0.026                                  | 2.114  | 0.814 | 0.049                                   | 7.544  | 0.999 |
|                | C <sub>x</sub> -LDH    | 0.027                                  | 4.083  | 0.877 | 0.018                                   | 7.663  | 0.999 |
| Fe(II)/Fe(III) | C <sub>4x</sub> -LDH   | 0.205                                  | 10.51  | 0.915 | 0.135                                   | 20.41  | 0.999 |
|                | C <sub>2x</sub> -LDH   | 0.037                                  | 3.50   | 0.725 | 0.054                                   | 19.86  | 0.999 |
|                | C <sub>3x/2</sub> -LDH | 0.038                                  | 6.276  | 0.876 | 0.024                                   | 19.92  | 0.999 |
|                | C <sub>x</sub> -LDH    | 0.028                                  | 5.716  | 0.748 | 0.023                                   | 19.76  | 0.999 |
| MB             | C <sub>4x</sub> -LDH   | 0.219                                  | 14.99  | 0.993 | 0.046                                   | 16.493 | 0.999 |

|    |                        |       |       |       |        |        |       |
|----|------------------------|-------|-------|-------|--------|--------|-------|
|    | C <sub>2x</sub> -LDH   | 0.130 | 21.14 | 0.971 | 0.007  | 18.436 | 0.996 |
|    | C <sub>3x/2</sub> -LDH | 0.101 | 20.76 | 0.929 | 0.005  | 19.066 | 0.995 |
|    | C <sub>x</sub> -LDH    | 0.103 | 23.42 | 0.881 | 0.004  | 19.157 | 0.996 |
| MO | C <sub>4x</sub> -LDH   | 0.018 | 36.30 | 0.879 | 0.0009 | 66.98  | 0.996 |
|    | C <sub>2x</sub> -LDH   | 0.044 | 29.95 | 0.888 | 0.0028 | 66.05  | 0.999 |
|    | C <sub>3x/2</sub> -LDH | 0.046 | 22.98 | 0.794 | 0.004  | 64.10  | 0.999 |
|    | C <sub>x</sub> -LDH    | 0.124 | 79.95 | 0.968 | 0.006  | 63.29  | 0.999 |

Table S5: Parameters of adsorption isotherm models for the adsorption of As(V), F<sup>-</sup>, Fe(II)/Fe(III), MB and MO.

| Contaminants<br>Name | Sample ID              | Langmuir isotherm:                    |        |       |       | Freundlich isotherm:                       |        |       |
|----------------------|------------------------|---------------------------------------|--------|-------|-------|--------------------------------------------|--------|-------|
|                      |                        | $C_e/q_e = C_e/q_m + 1/K_L \cdot q_m$ |        |       |       | $\log q_e = \log K_F + 1/n_F \log C_e$     |        |       |
|                      |                        | $K_L$                                 | $q_m$  | $R_L$ | $R^2$ | $K_F$                                      | $n_F$  | $R^2$ |
|                      |                        | (L/mg)                                | (mg/g) |       |       | (g.mg <sup>-1</sup><br>min <sup>-1</sup> ) | (mg/g) |       |
| As(V)                | C <sub>4x</sub> -LDH   | 0.792                                 | 10.28  | 0.386 | 0.995 | 4.487                                      | 2.7    | 0.955 |
|                      | C <sub>2x</sub> -LDH   | 4.512                                 | 13.04  | 0.099 | 0.992 | 10.237                                     | 2.3    | 0.978 |
|                      | C <sub>3x/2</sub> -LDH | 3.853                                 | 22.37  | 0.114 | 0.990 | 15.713                                     | 3.2    | 0.991 |
|                      | C <sub>x</sub> -LDH    | 1.574                                 | 19.42  | 0.241 | 0.999 | 9.105                                      | 4.0    | 0.794 |

|                |                        |       |        |       |       |       |     |       |
|----------------|------------------------|-------|--------|-------|-------|-------|-----|-------|
| F <sup>-</sup> | C <sub>4x</sub> -LDH   | 0.072 | 8.07   | 0.819 | 0.969 | 0.975 | 1.9 | 0.982 |
|                | C <sub>2x</sub> -LDH   | 0.265 | 16.34  | 0.416 | 0.999 | 5.082 | 2.9 | 0.968 |
|                | C <sub>3x/2</sub> -LDH | 0.424 | 20.40  | 0.308 | 0.998 | 8.082 | 3.1 | 0.921 |
|                | C <sub>x</sub> -LDH    | 0.488 | 18.40  | 0.279 | 0.998 | 7.825 | 3.3 | 0.931 |
| Fe(II)/Fe(III) | C <sub>4x</sub> -LDH   | 1.146 | 80.00  | 0.080 | 0.914 | 47.56 | 1.2 | 0.995 |
|                | C <sub>2x</sub> -LDH   | 1.889 | 44.84  | 0.050 | 0.975 | 29.44 | 1.6 | 0.903 |
|                | C <sub>3x/2</sub> -LDH | 2.035 | 43.48  | 0.046 | 0.972 | 28.90 | 1.7 | 0.873 |
|                | C <sub>x</sub> -LDH    | 1.262 | 49.09  | 0.073 | 0.947 | 27.53 | 1.5 | 0.907 |
| MB             | C <sub>4x</sub> -LDH   | 2.28  | 122.1  | 0.119 | 0.986 | 71.63 | 5.1 | 0.952 |
|                | C <sub>2x</sub> -LDH   | 1.78  | 118.34 | 0.147 | 0.994 | 62.24 | 4.3 | 0.985 |
|                | C <sub>3x/2</sub> -LDH | 0.37  | 96.15  | 0.451 | 0.990 | 39.15 | 4.4 | 0.993 |
|                | C <sub>x</sub> -LDH    | 0.51  | 97.08  | 0.375 | 0.993 | 35.24 | 4.2 | 0.979 |
| MO             | C <sub>4x</sub> -LDH   | 1.62  | 328.9  | 0.160 | 0.973 | 148.6 | 3.1 | 0.979 |
|                | C <sub>2x</sub> -LDH   | 0.84  | 323.6  | 0.268 | 0.982 | 121.7 | 3.2 | 0.972 |
|                | C <sub>3x/2</sub> -LDH | 0.31  | 299.0  | 0.496 | 0.922 | 68.2  | 1.7 | 0.993 |
|                | C <sub>x</sub> -LDH    | 0.22  | 280.1  | 0.579 | 0.966 | 49.3  | 1.7 | 0.997 |
